# Supplementary material for: A checklist to guide the planning, designing, implementation, and evaluation of learning analytics dashboards
Source: Springer Nature journal article supplement (doi:10.1186/s41239-023-00394-6), 2023-05-02
Supplement: MOESM1 [file 41239_2023_394_MOESM1_ESM.pdf]

Table A1. The coding of the reviewed papers according to Context, Purpose (A=awareness, SM=reflection and sense-making, ACT=action), Stakeholders involved in the design (T=teachers, LS=learning scientists or instructional designers, LA=LA researchers, E=engineers or interface designers), Level of involvement of stakeholders (II=initial input, FP=feedbacking prototypes, IP=prototype design), Deployment stage (P=low-fidelity prototype, HFP=high-fidelity prototype, PL=pilot, CU=classroom use) and Evaluation level (R=reaction, L=learning, B=behaviour, RS=results).

| Year | Title                                                                                                           | Authors                                                                                                                  | Dashboard Name | Context | Purpose    | Privacy& ethics | Stake holders | Level | Implement ation stage | Evaluation | Outlet     |
|------|-----------------------------------------------------------------------------------------------------------------|--------------------------------------------------------------------------------------------------------------------------|----------------|---------|------------|-----------------|---------------|-------|-----------------------|------------|------------|
| 2019 | "I Spent More Time with that Team": Making Spatial Pedagogy Visible Using Positioning Sensors                   | Roberto Martinez-Maldonado                                                                                               |                | HEI     | A          | Yes             | -             |       | PL                    | R          | conference |
| 2019 | A handheld classroom dashboard: Teachers' perspectives on the use of real-time collaborative learning analytics | Roberto Martinez-Maldonado                                                                                               |                | HEI     | A, SM, ACT | Yes             | T             | FP    | PL                    | R, L, B    | journal    |
| 2019 | A Learning Analytics Dashboard to Analyse Learning Activities in Interpreter Training Courses                   | Davide Taibi<br>Francesca Bianchi<br>Philipp Kemkes<br>Ivana Marenzi                                                     |                | HEI     | A, ACT     | -               | T, LA         |       | PL                    | R, L       | conference |
| 2016 | A learning analytics tool with hybrid graphical and textual interpretation generation                           | Daniel Amo Filvà, Marc Alier, María José Casany, and Enric Mayol                                                         |                | HEI     | SM, ACT    | -               | -             |       | PL                    | R          | conference |
| 2021 | A Teacher-facing Learning Analytics Dashboard for Process-oriented Feedback in Online Learning                  | Raphael A Dourado, Rodrigo Lins Rodrigues, Nivan Ferreira, Rafael Ferreira Mello, Alex Sandro Gomes, and Katrien Verbert |                | HEI     | A, SM, ACT | -               | T, E          |       | P                     | R          | conference |
| 2021 | Affective Teacher Tools: Affective Class Report Card and Dashboard                                              | Ankit Gupta<br>Neeraj Menon<br>William Lee<br>William Rebersky<br>Daniell                                                |                | K-12    | A          | -               | T, E          | FP    | P                     | R, L       | conference |

Table A1. The coding of the reviewed papers according to Context, Purpose (A=awareness, SM=reflection and sense-making, ACT=action), Stakeholders involved in the design (T=teachers, LS=learning scientists or instructional designers, LA=LA researchers, E=engineers or interface designers), Level of involvement of stakeholders (II=initial input, FP=feedbacking prototypes, IP=prototype design), Deployment stage (P=low-fidelity prototype, HFP=high-fidelity prototype, PL=pilot, CU=classroom use) and Evaluation level (R=reaction, L=learning, B=behaviour, RS=results).

|      |                                                                                                                         |                                                                                                                      |         |      |            |   |       |        |     |          |            |
|------|-------------------------------------------------------------------------------------------------------------------------|----------------------------------------------------------------------------------------------------------------------|---------|------|------------|---|-------|--------|-----|----------|------------|
|      |                                                                                                                         | e AllesioTom MurrayBeverly WoolfJacob Whitehillvon Arroyo                                                            |         |      |            |   |       |        |     |          |            |
| 2020 | An Actionable Orchestration dashboard to Enhance Collaboration in the Classroom                                         | I. Amarasinghe; D. Hernv <sup>o</sup> ndez-Leo; K. Michos; M. Vujovic                                                |         | HEI  | A, ACT     | - | T     | II, FP | PL  | R, B, RS | journal    |
| 2021 | Beyond First Encounters with Analytics: Questions, Techniques and Challenges in Instructors' Sensemaking                | Qiuji Li, Yeonji Jung, and Alyssa Friend Wise                                                                        |         | HEI  | A          | - | -     |        | CU  | R        | conference |
| 2021 | Collaborative learning in mathematics classrooms: Can teachers understand progress of concurrent collaborating groups?, | Baruch B. Schwarz, Osama Swidan, Naomi Prusak, Alik Palatnik,                                                        | SAGLET  | K-12 | A, SM, ACT | - | -     |        | HFP | L        | journal    |
| 2012 | Course signals at Purdue: using learning analytics to increase student success                                          | Kimberly E. Arnold and Matthew D. Pistilli.                                                                          | Signals | HEI  | SM, ACT    | - | -     |        | CU  | B        | conference |
| 2019 | Designing Narrative Slideshows for learning analytics                                                                   | Q. Chen; Z. Li; T. -C. Pong; H. Qu                                                                                   |         | MOOC | SM, ACT    | - | T, LS | II     | HFP | R        | conference |
| 2017 | Developing a MOOC experimentation platform: insights from a user study                                                  | Vitomir Kovanović, Srećko Joksimović, Philip Katerinopoulos, Charalampos Michail, George Siemens, and Dragan Gašević | MOOCito | MOOC | SM, ACT    | - | -     |        | HFP | R        | conference |

Table A1. The coding of the reviewed papers according to Context, Purpose (A=awareness, SM=reflection and sense-making, ACT=action), Stakeholders involved in the design (T=teachers, LS=learning scientists or instructional designers, LA=LA researchers, E=engineers or interface designers), Level of involvement of stakeholders (II=initial input, FP=feedbacking prototypes, IP=prototype design), Deployment stage (P=low-fidelity prototype, HFP=high-fidelity prototype, PL=pilot, CU=classroom use) and Evaluation level (R=reaction, L=learning, B=behaviour, RS=results).

|      |                                                                                                                                       |                                                                        |            |      |            |     |           |        |     |   |            |
|------|---------------------------------------------------------------------------------------------------------------------------------------|------------------------------------------------------------------------|------------|------|------------|-----|-----------|--------|-----|---|------------|
| 2020 | Development and evaluation of learning analytics dashboards to support online discussion activities                                   | M Yoo, SH Jin                                                          |            | HEI  | A          | -   | LS, LA, E | FP, IP | PL  | R | journal    |
| 2015 | Digitally enhanced assessment in virtual learning environments                                                                        | Enrica Pesare, Teresa Roselli, Veronica Rossano, Pierpaolo Di Bitonto, |            | HEI  | A, ACT     | Yes | -         |        | PL  | R | journal    |
| 2021 | Do Teachers Find Dashboards Trustworthy, Actionable and Useful? A Vignette Study Using a Logs and Audio Dashboard                     | Reet KasepaluPankaj ChejaraLuis P. PrietoTobias Ley                    | Cotrack    | K-12 | A, SM, ACT | -   | T         | II, FP | HFP | R | journal    |
| 2017 | Effects of a Dashboard for an Intelligent Tutoring System on Teacher Knowledge, Lesson Plans and Class Sessions                       | François Beska XhakajVincent AlevinBruce M. McLaren                    | Luna       | K-12 | A, ACT     | -   | T         | II, FP | PL  | B | conference |
| 2017 | Effects of a Teacher Dashboard for an Intelligent Tutoring System on Teacher Knowledge, Lesson Planning, Lessons and Student Learning | François Beska XhakajVincent AlevinBruce M. McLaren                    | Luna       | K-12 | ACT        | -   | T         | II, FP | PL  | L | conference |
| 2017 | EMODA: a tutor oriented multimodal and contextual emotional dashboard                                                                 | Mohamed Ez-zaouia and Elise Lavoué                                     | EMODA      | HEI  | A          | -   | -         |        | PL  | R | conference |
| 2020 | Emodash: A dashboard supporting retrospective awareness of emotions in online learning,                                               | Mohamed Ez-zaouia, Aurélien Tabard, Elise Lavoué,                      | Emodash    | HEI  | A          | -   | T, E      | II, FP | PL  | B | journal    |
| 2019 | Empowering online teachers through predictive learning analytics                                                                      | Herodotou, C., Hlostá, M., Boroowa, A., Rienties, B.,                  | OU Analyse | HEI  | SM, ACT    | -   | -         |        | CU  | R | journal    |

Table A1. The coding of the reviewed papers according to Context, Purpose (A=awareness, SM=reflection and sense-making, ACT=action), Stakeholders involved in the design (T=teachers, LS=learning scientists or instructional designers, LA=LA researchers, E=engineers or interface designers), Level of involvement of stakeholders (II=initial input, FP=feedbacking prototypes, IP=prototype design), Deployment stage (P=low-fidelity prototype, HFP=high-fidelity prototype, PL=pilot, CU=classroom use) and Evaluation level (R=reaction, L=learning, B=behaviour, RS=results).

|      |                                                                                                                                                     |                                                                                                      |             |      |         |     |          |    |     |       |            |
|------|-----------------------------------------------------------------------------------------------------------------------------------------------------|------------------------------------------------------------------------------------------------------|-------------|------|---------|-----|----------|----|-----|-------|------------|
|      |                                                                                                                                                     | Zdrahal, Z., and Mangafa, C.                                                                         |             |      |         |     |          |    |     |       |            |
| 2021 | Evaluating a Learning Analytics Dashboard to Visualize Student Self-Reports of Time-on-task: A Case Study in a Latin American University            | Isabel Hilliger, Constanza Miranda, Gregory Schuit, Fernando Duarte, Martin Anselmo, and Denis Parra |             | HEI  | A       | -   | T        | II | PL  | L     | conference |
| 2020 | Evaluating the scaling of a LA tool through the lens of the SHEILA framework: A comparison of two cases from tinkerers to institutional adoption,   | Vigentini, Lorenzo and Liu, Danny YT and Arthars, Natasha and Dollinger, Mollie                      | SRES        | HEI  | ACT     | Yes | T, LA, E |    |     | RS    | journal    |
| 2020 | Evaluation of a learning analytics tool for supporting teachers in the creation and evaluation of accessible and quality open educational resources | Avila, C., Baldiris, S., Fabregat, R., and Graf, S. (                                                | ATCE        | HEI  | ACT     | -   | -        |    | PL  | R     | journal    |
| 2017 | Examining Instructor Use of Learning Analytics                                                                                                      | Suzanne L. Dazo, Nicholas R. Stepanek, Aarjav Chauhan, and Brian Dorn.                               | TrACE       | HEI  | A       | -   | -        |    | PL  | R     | conference |
| 2021 | Examining the Use of a Teacher Alerting Dashboard During Remote Learning                                                                            | Rachel DicklerAmy AdairJanice GobertHuma Hussain-AbidiJoe OlsenMariel                                | Inq-Blotter | K-12 | SM, ACT | -   | -        |    | HFP | R, RS | conference |

Table A1. The coding of the reviewed papers according to Context, Purpose (A=awareness, SM=reflection and sense-making, ACT=action), Stakeholders involved in the design (T=teachers, LS=learning scientists or instructional designers, LA=LA researchers, E=engineers or interface designers), Level of involvement of stakeholders (II=initial input, FP=feedbacking prototypes, IP=prototype design), Deployment stage (P=low-fidelity prototype, HFP=high-fidelity prototype, PL=pilot, CU=classroom use) and Evaluation level (R=reaction, L=learning, B=behaviour, RS=results).

|      |                                                                                                                                                  |                                                                                                       |     |      |         |     |      |        |     |       |            |
|------|--------------------------------------------------------------------------------------------------------------------------------------------------|-------------------------------------------------------------------------------------------------------|-----|------|---------|-----|------|--------|-----|-------|------------|
|      |                                                                                                                                                  | O,ÃBrienMichael Sao Pedro                                                                            |     |      |         |     |      |        |     |       |            |
| 2021 | Experiences in the use of an adaptive intelligent system to enhance online learners' performance: a case study in Economics and Business courses | Ana-Elena Guerrero-RoldvnM. Elena Rodrv#iguez-GonzvlezDavid Bav#eresAmal Elasi-EjjaberiPau Cortadas | LIS | HEI  | SM, ACT | -   | -    |        | PL  | R, RS | journal    |
| 2021 | Facilitators First: Building a Tool With Facilitators to Foster a More Collaborative Makerspace Community Through Movement Traces                | L#onore V. Guillain and Bertrand Schneider.                                                           |     | K-12 | SM, ACT | -   | T    | II, FP | HFP | R     | conference |
| 2020 | From Data to Insights: A Layered Storytelling Approach for Multimodal Learning Analytics                                                         | Roberto Martinez-Maldonado, Vanessa Echeverria, Gloria Fernandez Nieto, and Simon Buckingham Shum     |     | HEI  | A, ACT  | Yes | -    |        | HFP | R     | conference |
| 2020 | From theory to action: developing and evaluating learning analytics for learning design                                                          | Korah J. Wiley, Yannis Dimitriadis, Allison Bradford, and Marica C. Linn.                             |     | K-12 | SM, ACT | -   | T, E | II, FP | PL  | R     | conference |

Table A1. The coding of the reviewed papers according to Context, Purpose (A=awareness, SM=reflection and sense-making, ACT=action), Stakeholders involved in the design (T=teachers, LS=learning scientists or instructional designers, LA=LA researchers, E=engineers or interface designers), Level of involvement of stakeholders (II=initial input, FP=feedbacking prototypes, IP=prototype design), Deployment stage (P=low-fidelity prototype, HFP=high-fidelity prototype, PL=pilot, CU=classroom use) and Evaluation level (R=reaction, L=learning, B=behaviour, RS=results).

|      |                                                                                                                        |                                                                                                                 |              |      |            |     |       |        |     |    |            |
|------|------------------------------------------------------------------------------------------------------------------------|-----------------------------------------------------------------------------------------------------------------|--------------|------|------------|-----|-------|--------|-----|----|------------|
| 2020 | Helping Teachers Assist Their Students in Gamified Adaptive Educational Systems: Towards a Gamification Analytics Tool | Kamilla Tennrio, Geiser Chalco ChalcoDiego DermevalBruno LemosPedro NascimentoRodrigo SantosAlan Pedro da Silva | GamAnalytics | HEI  | A, ACT     | -   | -     |        | PL  | RS | conference |
| 2019 | Intelligent analysis and data visualisation for teacher assistance tools: The case of exploratory learning             | Mavrikis, M., Geraniou, E., Gutierrez Santos, S., and Poulouvassilis, A.                                        |              | HEI  | A, SM, ACT | -   | T     | II, FP | HFP | R  | journal    |
| 2019 | Investigating the Impact of a Real-time, Multimodal Student Engagement Analytics Technology in Authentic Classrooms    | Sinem Aslan, Nese Alyuz, Cagri Tanriover, Sinem E. Mete, Eda Okur, Sidney K. D'Mello, and Asli Arslan Esme.     | SEAT         | HEI  | SM, ACT    | Yes | T, LS | II, FP | PL  | RS | conference |
| 2016 | iSAT: a visual learning analytics tool for instructors                                                                 | Rwitajit MajumdarSridhar Iyer                                                                                   | iSAT         | HEI  | A, SM      | -   | -     |        | HFP | R  | journal    |
| 2021 | Learning analytics dashboards for adaptive support in face-to-face collaborative argumentation,                        | Jeongyun Han, Kwan Hoon Kim, Wonjong Rhee, Young Hoan Cho,                                                      | FCA          | HEI  | A, SM, ACT | Yes | -     |        | HFP | RS | journal    |
| 2016 | Lernanto: Using an Ambient Display During Differentiated Instruction                                                   | Erik van Alphen and Saskia Bakker                                                                               | Lernanto     | K-12 | A, ACT     | -   | -     |        | HFP | R  | conference |

Table A1. The coding of the reviewed papers according to Context, Purpose (A=awareness, SM=reflection and sense-making, ACT=action), Stakeholders involved in the design (T=teachers, LS=learning scientists or instructional designers, LA=LA researchers, E=engineers or interface designers), Level of involvement of stakeholders (II=initial input, FP=feedbacking prototypes, IP=prototype design), Deployment stage (P=low-fidelity prototype, HFP=high-fidelity prototype, PL=pilot, CU=classroom use) and Evaluation level (R=reaction, L=learning, B=behaviour, RS=results).

|      |                                                                                                                  |                                                                                                                   |                 |      |            |     |       |        |     |   |            |
|------|------------------------------------------------------------------------------------------------------------------|-------------------------------------------------------------------------------------------------------------------|-----------------|------|------------|-----|-------|--------|-----|---|------------|
| 2018 | Maestro: Designing a System for Real-Time Orchestration of 3D Modeling Workshops                                 | Volodymyr Dziubak, Ben Lafreniere, Tovi Grossman, Andrea Bunt, and George Fitzmaurice                             | Maestro         | K-12 | A, SM, ACT | -   | -     | FP     | HFP | L | conference |
| 2018 | OARS: exploring instructor analytics for online learning                                                         | Jonathan Bassen, Iris Howley, Ethan Fast, John Mitchell, and Candace Thille                                       | OARS            | HEI  | A, SM, ACT | Yes | T     | II     | PL  | R | conference |
| 2019 | PerformanceVis: Visual analytics of student performance data from an introductory chemistry course,              | Haozhang Deng, Xuemeng Wang, Zhiyi Guo, Ashley Decker, Xiaojing Duan, Chaoli Wang, G. Alex Ambrose, Kevin Abbott, | Performance Vis | HEI  | A, SM, ACT | -   | LS, E | II     | PL  | L | journal    |
| 2021 | Self-regulation and emotion matter: A case study of instructor interactions with a learning analytics dashboard, | Juan Zheng, Lingyun Huang, Shan Li, Susanne P. Lajoie, Yuxin Chen, Cindy E. Hmelo-Silver,                         | HOWARD          | HEI  | A, SM      | -   | -     |        | HFP | L | journal    |
| 2018 | Sensei: Sensing Educational Interaction                                                                          | Nazmus Saquib, Ayesha Bose, Dwyane George, and Sepandar Kamvar                                                    | Sensei          | K-12 | A, SM, ACT | Yes | T, LS | II, FP | HFP | L | conference |

Table A1. The coding of the reviewed papers according to Context, Purpose (A=awareness, SM=reflection and sense-making, ACT=action), Stakeholders involved in the design (T=teachers, LS=learning scientists or instructional designers, LA=LA researchers, E=engineers or interface designers), Level of involvement of stakeholders (II=initial input, FP=feedbacking prototypes, IP=prototype design), Deployment stage (P=low-fidelity prototype, HFP=high-fidelity prototype, PL=pilot, CU=classroom use) and Evaluation level (R=reaction, L=learning, B=behaviour, RS=results).

|      |                                                                                                                                                                |                                                                                         |               |                   |            |     |   |        |     |         |            |
|------|----------------------------------------------------------------------------------------------------------------------------------------------------------------|-----------------------------------------------------------------------------------------|---------------|-------------------|------------|-----|---|--------|-----|---------|------------|
| 2018 | Specification and evaluation of an assessment engine for educational games: Empowering educators with an assessment editor and a learning analytics dashboard, | Yaëlle Chaudy, Thomas Connolly,                                                         | EngAGe        | K-12              | ACT        | -   | T | II     | HFP | R       | journal    |
| 2018 | Supporting awareness in communities of learning design practice,                                                                                               | Konstantinos Michos, Davinia Hernández-Leo,                                             | inILDE        | K-12              | A          | -   | T | II, FP | PL  | R       | journal    |
| 2018 | Supporting Differentiated Instruction in Programming Courses through Permanent Progress Monitoring                                                             | Nuno Gil Fonseca, Luís Macedo, and António José Mendes                                  | CodeInsights  | HEI               | A, ACT     | Yes | - |        | PL  | RS      | conference |
| 2017 | Teacher Dashboards in Practice: Usage and Impact                                                                                                               | Inge MolenaarCaroli en Knoop-van Campen                                                 | Snappet       | K-12              | A          | -   | - |        | CU  | R       | conference |
| 2015 | Teacher regulation of cognitive activities during student collaboration: Effects of learning analytics,                                                        | Anouschka van Leeuwen, Jeroen Janssen, Gijsbert Erkens, Mieke Brekelmans,               | Concept Trail | HEI               | A, SM, ACT | -   | - |        | HFP | R, L, B | journal    |
| 2021 | The engagement of university teachers with predictive learning analytics,                                                                                      | Christothea Herodotou, Claire Maguire, Nicola McDowell, Martin Hlosta, Avinash Boroowa, | Early Alert   | HEI               | SM, ACT    | -   | - |        | CU  | R, B    | journal    |
| 2020 | Towards fine-grained reading dashboards for online course revision                                                                                             | Madjid SadallahBenovÆt EncelleAzze-Eddine                                               | CoReaDa       | Informal learning | ACT        | -   | - |        | HFP | R       | journal    |



Table A1. The coding of the reviewed papers according to Context, Purpose (A=awareness, SM=reflection and sense-making, ACT=action), Stakeholders involved in the design (T=teachers, LS=learning scientists or instructional designers, LA=LA researchers, E=engineers or interface designers), Level of involvement of stakeholders (II=initial input, FP=feedbacking prototypes, IP=prototype design), Deployment stage (P=low-fidelity prototype, HFP=high-fidelity prototype, PL=pilot, CU=classroom use) and Evaluation level (R=reaction, L=learning, B=behaviour, RS=results).

|      |                                                                                                     |                                                                                                        |          |      |               |   |              |        |     |      |            |
|------|-----------------------------------------------------------------------------------------------------|--------------------------------------------------------------------------------------------------------|----------|------|---------------|---|--------------|--------|-----|------|------------|
|      |                                                                                                     | MaredjYannick<br>Priv©                                                                                 |          |      |               |   |              |        |     |      |            |
| 2020 | UserFlow: A Tool for Visualizing Fine-grained Contextual Analytics in Teaching Documents            | Shaveen Singh,<br>Bernd Meyer,<br>and Michael<br>Wybrow                                                | UserFlow | HEI  | ACT           | - | T, LS,<br>LA | II, FP | PL  | R    | conference |
| 2015 | Using Learning Analytics to Visualise Computer Science Teamwork                                     | Hamid<br>Tarmazdi,<br>Rebecca Vivian,<br>Claudia Szabo,<br>Katrina Falkner,<br>and Nickolas<br>Falkner |          | HEI  | A, SM,<br>ACT | - | -            |        | PL  | R    | conference |
| 2019 | What information should CSCL teacher dashboards provide to help teachers interpret CSCL situations? | Anouschka van<br>LeeuwenNikol<br>RummelTamara<br>van Gog                                               |          | K-12 | A, SM,<br>ACT | - | T            | II     | HFP | R, L | journal    |
